# Supplementary material for: Twelve Positions in a β-Lactamase That Can Expand Its Substrate Spectrum with a Single Amino Acid Substitution
Source: PubMed Central journal article supplement (PMC3358254; doi:10.1371/journal.pone.0037585), 2012-05-22
Supplement: pone.0037585.s001.pdf [file pone.0037585.s001.pdf]

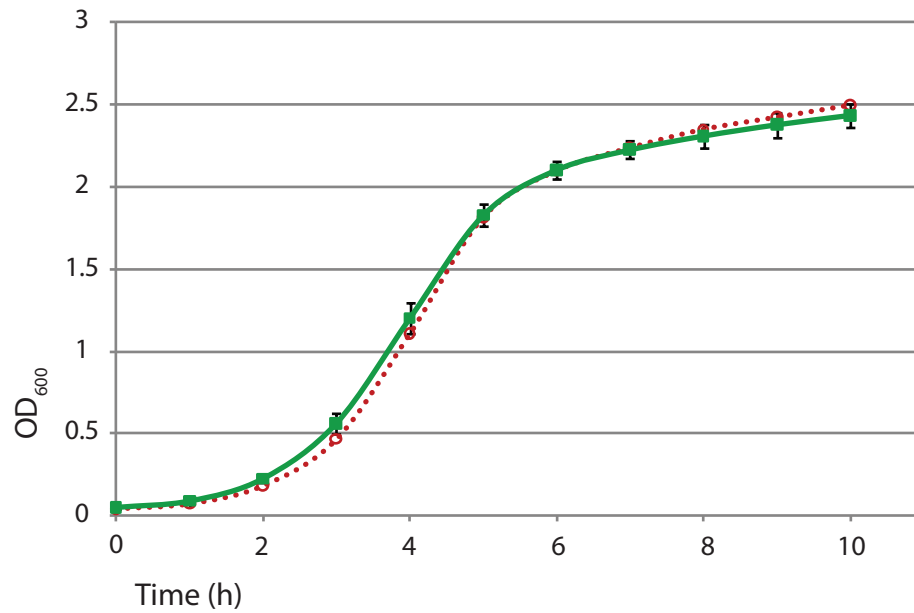

Figure S1. Growth curves of *Burkholderia thailandensis* strains. The average growth curve (green solid line) of the ceftazidime-resistant strains, representing the twenty nine substitutions in the presence of 5  $\mu\text{g/ml}$  ceftazidime, is shown with error bars. The growth curve of the wild-type strain (red dotted line) in the absence of the antibiotic is also shown.
